# Supplementary material
Source: PubMed Central journal article supplement (PMC6369454)
Supplement: mmc1.pdf [file mmc1.pdf]

**Supplemental Data**

***De Novo* SOX4 Variants Cause a Neurodevelopmental  
Disease Associated with Mild Dysmorphism**

Ash Zawerton, Baojin Yao, J. Paige Yeager, Tommaso Pippucci, Abdul Haseeb, Joshua D. Smith, Lisa Wischmann, Susanne J. Köhl, John C.S. Dean, Daniela T. Pilz, Susan E. Holder, Deciphering Developmental Disorders Study, University of Washington Center for Mendelian Genomics, Alisdair McNeill, Claudio Graziano, and Véronique Lefebvre

## **Supplemental Note: Case Reports**

**Subject 1** was a 4-year-and-8-month-old male. Array comparative genomic hybridization (array-CGH) excluded pathogenic copy-number variants, and analysis for fragile-X syndrome was negative. Trio-based exome sequencing revealed no plausible pathogenic mutation beside a heterozygous *de novo* *SOX4* missense variant: hg19 chr6:21594963C>A, p.Phe66Leu. This subject was the son of healthy non-consanguineous Italian parents. He had two older healthy half-sisters (one paternal and one maternal). His mother was 33-year-old at conception and his father 41. Pregnancy was complicated by intrauterine growth retardation and he was born after 37 weeks of gestation by C-section. Birth weight was 1970 g (10<sup>th</sup> percentile) and length was 43 cm (<3<sup>rd</sup> percentile). On initial examination at 3 years and 2 months of age, his height was 85 cm (1<sup>st</sup> percentile), his weight was 11.0 kg (1<sup>st</sup> percentile) and his head circumference was 46.5 cm (3<sup>rd</sup> percentile). At 4 years and 8 months of age, his height was 100.7 cm (10<sup>th</sup> percentile), his weight was 15.0 kg (8<sup>th</sup> percentile), and his head circumference was 47.6 cm (1<sup>st</sup> percentile), indicating progressive microcephaly. He had global developmental delay: independent walking was only possible at 27 months and he spoke his first words at 4 years. He had seizures that started at 3.5 years of age. Treatment with valproic acid was started, but the response was unsatisfactory, with the child maintaining brief, daily crises. He was hypotonic and had a perimembranous ventricular septal defect. He had feeding difficulties, was unable to eat solid food, and had dysphagia and severe constipation. Eye examination revealed strabismus and keratoconus. Brain MRI demonstrated a delay in myelination. His IQ score was 68 (mild ID). He had slight facial dysmorphism: microbrachycephaly, epicanthus of the left eye, a stellate iris pattern, a short nose with anteverted nares, a wide mouth with a cupid bow, and posteriorly rotated ears. He also had bilateral clinodactyly of the 5<sup>th</sup> finger, but hands and feet were otherwise normal. Submission of *SOX4* to GeneMatcher<sup>1</sup> facilitated the present study by identifying Subjects 2 to 4 in the DDD database of *de novo* variants in 4296 children with developmental disorders.<sup>2</sup>

**Subject 2** was an 11-year-and-10-month-old male of Scottish-Hungarian ancestry. He was found by trio-based exome sequencing to carry a heterozygous *de novo* SOX4 missense variant: hg19 chr6:21595099G>C, p.Ala112Pro. No other plausible pathogenic variant was found. CGH revealed a duplication of Yp11.31-11.222 not present in his father and likely unrelated to his phenotype. This child was the fourth of five children of healthy non-consanguineous parents. His father was 66-year-old at conception and his mother 34. Pregnancy was complicated by a bleed in the first trimester which was thought to be associated with the loss of a twin sibling. Born at 40 weeks of gestation, the baby weighed 3.5 kg (46<sup>th</sup> percentile), had bilateral, vertical talus, which was surgically corrected in infancy, and also had laryngomalacia. There were initial concerns about his weight gain and he had problems weaning. He otherwise reached his developmental milestones, but lost his ability to roll and bear weight almost overnight when he was 10-month-old. His parents associated this with a homeopathic treatment that he was receiving at the time. He developed a spastic quadriparesis, most prominent in the lower limbs. Brain MRI at age 15 months and 6 years demonstrated progressive cerebellar atrophy. There were also some patchy cerebral white matter changes. At 6 years and 8 months of age, his weight was 14.8 kg (1<sup>st</sup> percentile) and his head circumference was 48.3 cm (<0.4<sup>th</sup> percentile). His OFC has remained at this size ever since. When he was last seen, at 11 years and 10 months of age, his neurodevelopmental disorder had been static for many years. He was still a slow eater, had problems chewing and requires mashed food. He had never walked, had no speech and had severe intellectual disability. However, he was very alert and aware of his surroundings. He demonstrated bruxism and drooling. Secondary dentition was markedly delayed as he still had several primary teeth. In addition to microcephaly, he had trigonocephaly with a mild metopic ridge, bilateral epicanthic folds, infra-orbital folds, a wide mouth and a defined cupid's bow of the upper lip. He also had mild 5<sup>th</sup> finger clinodactyly.

**Subject 3** was a 6-year-old female. Trio-based exome sequencing indicated a heterozygous *de novo* SOX4 missense variant as sole pathogenic candidate variant: hg19 chr6:21594941 T>G, p.Ile59Ser. This child was small for her age (6<sup>th</sup> percentile for height, 9<sup>th</sup> for weight, and 12<sup>th</sup> for OFC). Her main problem at 3 years was delayed speech, with a limited vocabulary of single words. She responded well to speech therapy, and her speech was normal at 6 years. She had very mild learning disabilities and was not receiving extra help at mainstream school. The school were not concerned, but her mother reported that she was struggling to keep up with peers. She had characteristic facial features, with deep-set eyes, infra-orbital grooves, flat nasal bridge, upturned nares, wide cupid-bow mouth and full lips. She also had mild 5<sup>th</sup> finger clinodactyly and dysplastic 5<sup>th</sup> toenails.

**Subject 4** was an 8-year-and-10-month-old female. Trio-exome sequencing showed a heterozygous *de novo* SOX4 missense variant: hg19 chr6:21595080 G>T, p.Lys105Asn. No other pathogenic variant candidate was found. She had a normal delivery after 39 weeks of gestation, but had a low birth weight (2.35 kg, 1<sup>st</sup> percentile). When initially assessed at 6 years and 10 months of age, she was small for her age, but had a normal head circumference (3<sup>rd</sup> percentile for height and weight, and 45<sup>th</sup> percentile for OFC). She did not walk until 21 months of age and pronounced her first words at 24 months. At 8 years and 10 months of age, her full-scale IQ (WISC-IV UK) was 52. She was in mainstream school and receiving educational support. She was sociable and had satisfactory speech, despite earlier expressive difficulties. She was yet unable to read or write, and had no sense of danger. She had a characteristic facial appearance, with deep-set eyes, infra-orbital creases, malar flattening, upturned nares, wide cupid-bow mouth and full lips. The ears were low set, and posteriorly rotated. There was mild 5<sup>th</sup> finger clinodactyly and mild camptodactyly.

## Supplemental Figures

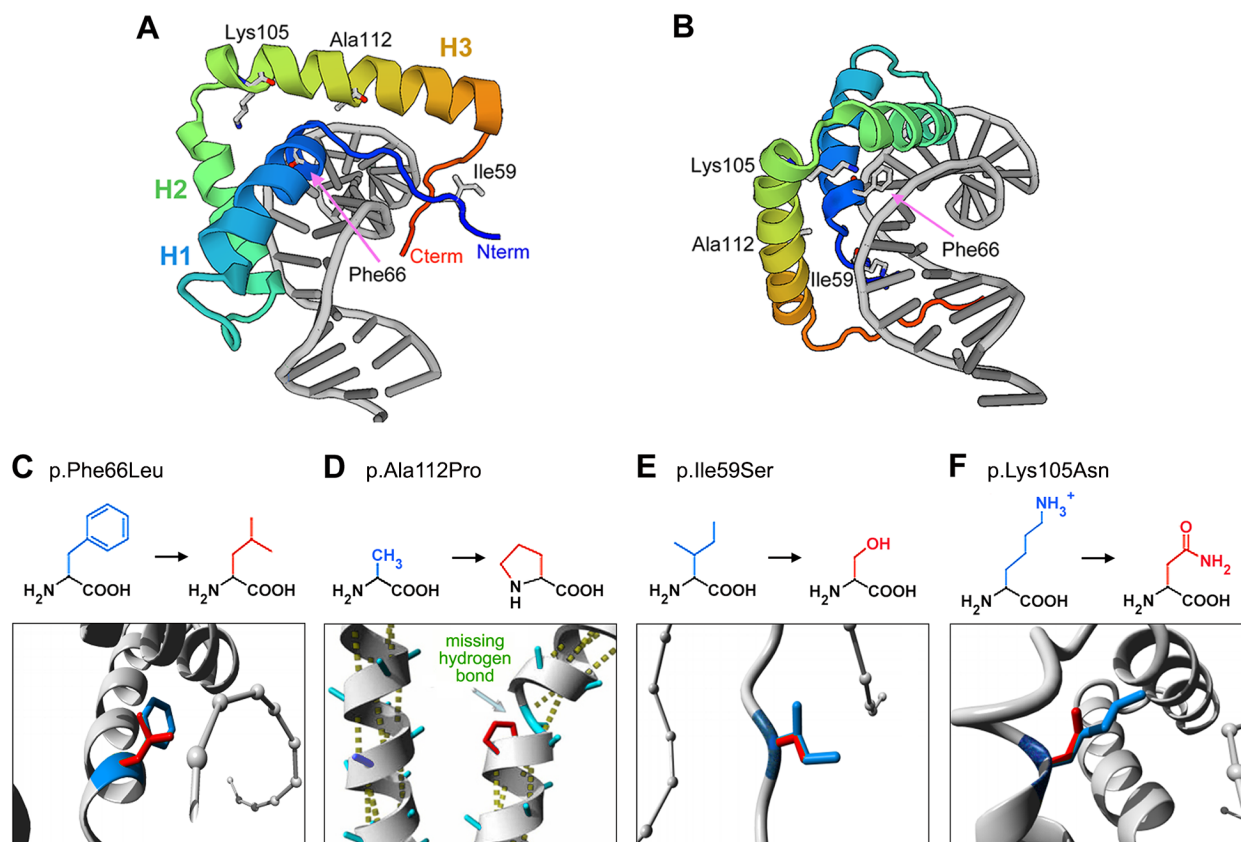

**Figure S1. *In Silico* Prediction of Changes in the HMG Domain Structure Induced by the Four Subjects' SOX4 Missense Variants.**

(A) Rendering of the wild-type SOX4 HMG domain–DNA complex. DNA is shown in grey and the SOX4 HMG domain is rainbow-colored. Its  $\alpha$ -helices are labeled H1, H2, and H3, and its N- and C-termini are indicated. The residues mutated in our subjects are indicated and their side chains are depicted. The HMG domain wraps around the DNA helix and induces a strong bend. This cartoon was generated by SWISS-MODEL using published data.<sup>3</sup>

(B) Same protein–DNA model as in panel A, but oriented differently to show the intercalation of the Phe66 side chain into the minor groove of the DNA helix.

(C to F) Top, schematics of wild-type and variant amino acids, with side chains colored in blue and red, respectively. Bottom, ribbon presentation of the SOX4 protein structure generated by HOPE to show structural changes caused by the variants. The protein is presented in grey and the side chains of the wild-type and mutant amino acids are colored in blue and red, respectively.

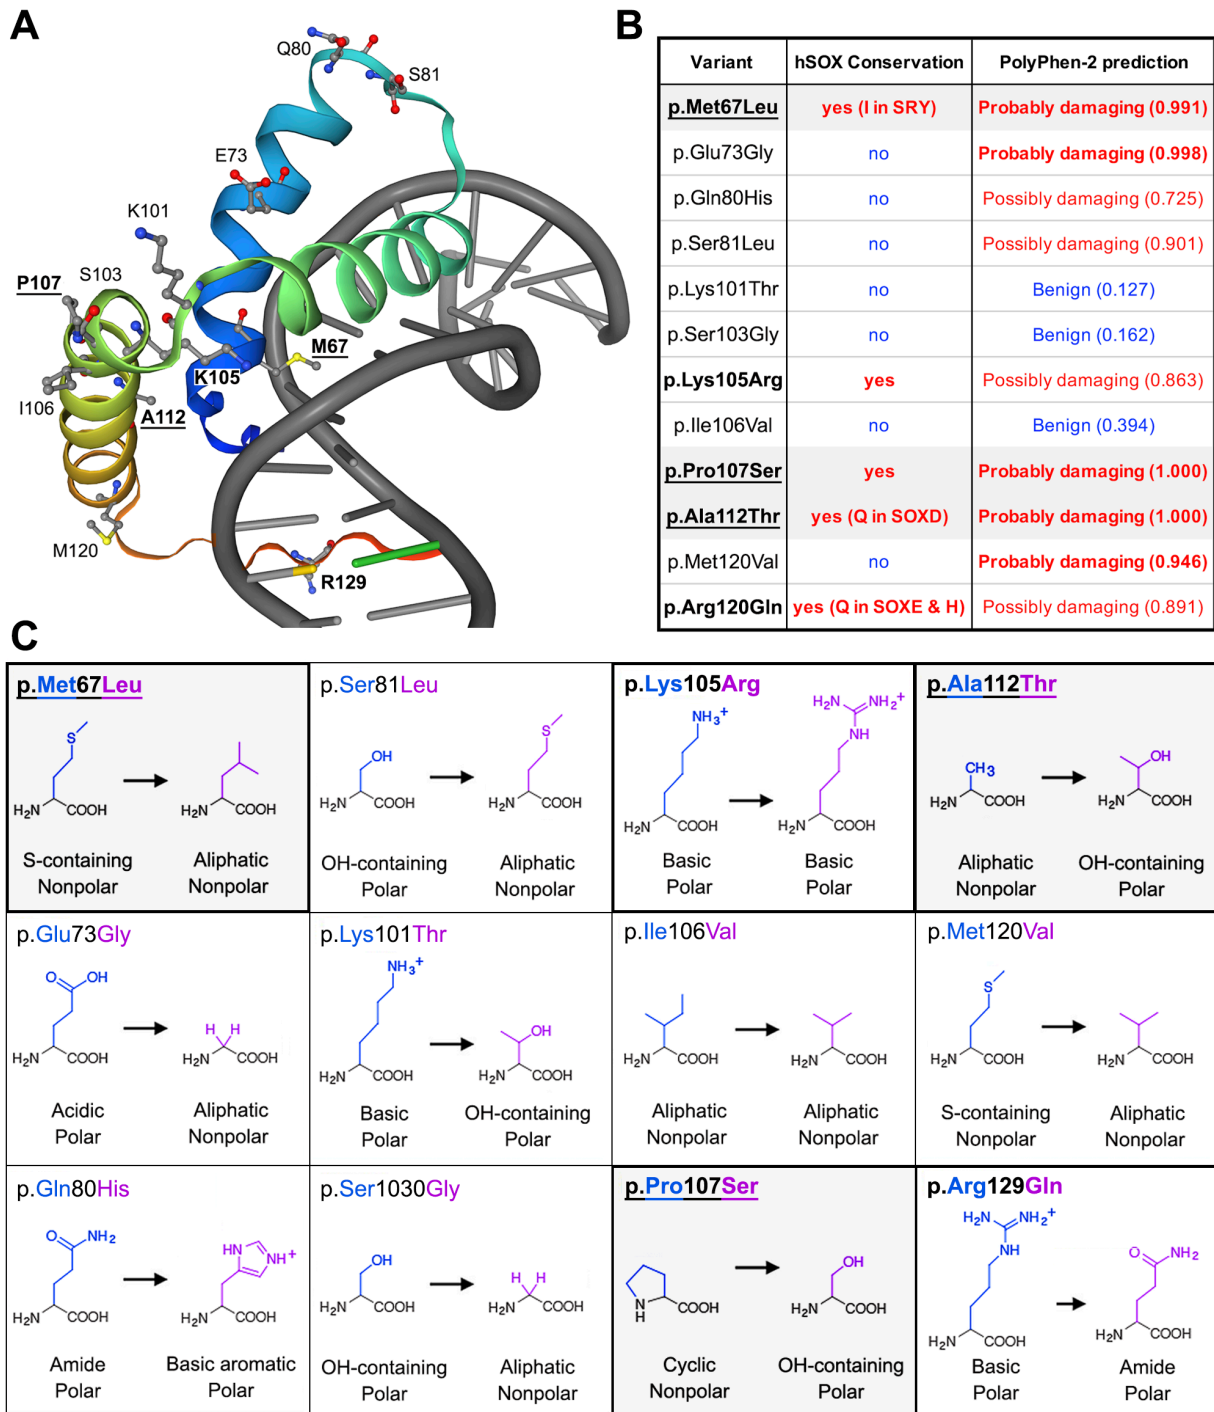

**Figure S2. *In Silico* Prediction of Changes in the HMG Domain Structure Induced by SOX4 Missense Variants Identified in gnomAD.**

(A) Rendering of the wild-type SOX4 HMG domain–DNA complex. DNA is shown in grey and the SOX4 HMG domain is rainbow-colored. Its  $\alpha$ -helices are labeled H1, H2, and H3, and its N- and

C-termini are indicated. The residues showing variants in gnomAD are indicated and their side chains are depicted. Bold characters are used for five residues that are highly conserved in human SOX proteins. Three of these residues are also underlined because their mutation is predicted by PolyPhen-2 to be probably damaging. This cartoon was generated by SWISS-MODEL using published data.<sup>3</sup>

(B) Table summarizing for each SOX residue that features a variant in gnomAD (left column) the degree of conservation in human SOX proteins (middle column) and the prediction score attributed by PolyPhen-2 for the consequence of the variant (right column). In the middle column, “yes” means conservation in all 20 SOX proteins; “no” means poor conservation; parentheses indicate residues found in other SOX proteins. Bold characters are used for five residues that are highly conserved in human SOX proteins. Three of these residues are also underlined and their boxes shaded in light grey because their mutation is predicted by PolyPhen-2 to be probably damaging.

(C) Schematics of wild-type and gnomAD variant amino acids, with side chains colored in blue and red, respectively. The features of the side chains are indicated. Bold characters are used for five residues that are highly conserved in human SOX proteins. Three of these residues are also underlined and their boxes shaded in light grey because their mutation is predicted by PolyPhen-2 to be probably damaging.

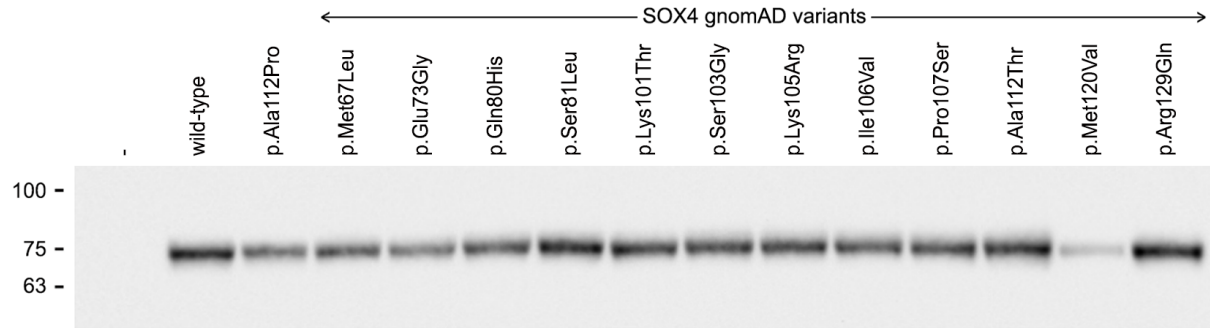

**Figure S3. Assessment of SOX4 gnomAD Variant Levels Achieved in COS-1 Cells.**

Western blot of lysates from COS-1 cells transiently transfected with expression plasmids for no protein (-), wild-type SOX4 (WT), the case-2 variant (p.Ala112Pro), and the twelve SOX4 gnomAD variants, as indicated. The blot was hybridized with an antibody recognizing the FLAG epitope added at the N-terminus of SOX4. The Mr of protein standards is indicated on the left (in k units). All SOX4 proteins migrate with an expected Mr of 70 k. This experiment complements the reporter assay shown in Figure 6D.



## **Supplemental Tables**

**Table S1. NCBI Accession Numbers for the HMG-Domain Sequences of Vertebrate SOX4 Orthologs Aligned in Figure 5B.**

| <b>Vertebrate Species</b>                    | <b>Reference Sequence</b> |
|----------------------------------------------|---------------------------|
| Human ( <i>Homo sapiens</i> )                | NM_003107.2               |
| Mouse ( <i>Mus musculus</i> )                | NM_009238.3               |
| Cow ( <i>Bos taurus</i> )                    | NM_001078128.1            |
| Horse ( <i>Equus caballus</i> )              | XM_023624515.1            |
| Bat ( <i>Eptesicus fuscus</i> )              | XM_008146131.1            |
| Hedgehog ( <i>Erinaceus europaeus</i> )      | XM_007525152.2            |
| Elephant ( <i>Loxodonta africana</i> )       | XM_010596185.2            |
| Opossum ( <i>Monodelphis domestica</i> )     | XM_007487879.2            |
| Platypus ( <i>Ornithorhynchus anatinus</i> ) | XM_007659031.1            |
| Chicken ( <i>Gallus gallus</i> )             | AY249864.1                |
| Frog ( <i>Xenopus laevis</i> )               | NM_001172201.1            |
| Zebrafish ( <i>Danio rerio</i> )             | AY369082.1                |

**Table S2. NCBI Accession Numbers for the HMG-Domain Sequences of All Human SOX Proteins Aligned in Figure 5C.**

| <b>SOX protein</b> | <b>Reference Sequence</b> |
|--------------------|---------------------------|
| SOX1               | NP_005977.2               |
| SOX2               | NP_003097.1               |
| SOX3               | NP_005625.2               |
| SOX4               | AAH72668.1                |
| SOX5               | AAH60773.1                |
| SOX6               | AAK26115.1                |
| SOX7               | CAC84226.1                |
| SOX8               | NP_055402.2               |
| SOX9               | CAA86598.1                |
| SOX10              | CAG38808.1                |
| SOX11              | BAA88122.1                |
| SOX12              | AAH67361.1                |
| SOX13              | AAD50120.1                |
| SOX14              | AAC95380.1                |
| SOX15              | AAH72003.1                |
| SOX17              | BAB83867.1                |
| SOX18              | BAA94874.1                |
| SOX21              | AAC95381.1                |
| SOX30              | BAA37146.1                |
| SRY                | CAA37790.1                |

**Table S3. DNA Oligonucleotides Used to Generate SOX4 Variant Expression Plasmids.** Wild-type and variant codons are shown in blue and red letters, respectively. Wild-type sequences are shown as references.

| Subject Variants | Forward Primers                       | Reverse Primers                       |
|------------------|---------------------------------------|---------------------------------------|
| Wild-type        | TGAACGCC <b>TTT</b> ATGGTGTGGTCGCAGA  | ACCACACCAT <b>AAA</b> GGCGTTCATGGGCC  |
| p.Phe66Leu       | TGAACGCC <b>TTA</b> ATGGTGTGGTCGCAGA  | ACCACACCAT <b>TAA</b> GGCGTTCATGGGCC  |
| Wild-type        | CATCCAGGAG <b>GCG</b> GAGCGGCTGCGCCT  | AGGCGCAGCCGCTC <b>CGC</b> CTCCTGGATG  |
| p.Ala112Pro      | CATCCAGGAG <b>CCG</b> GAGCGGCTGCGCCT  | AGGCGCAGCCGCTC <b>CGG</b> CTCCTGGATG  |
| Wild-type        | AGTGCCAC <b>ATC</b> AAGCGGCCCATGAAC   | GTTTCATGGGCCGCTT <b>GAT</b> GTGGCCACT |
| p.Ile59Ser       | AGTGCCAC <b>AGC</b> AAGCGGCCCATGAAC   | GTTTCATGGGCCGCTT <b>GCT</b> GTGGCCACT |
| Wild-type        | ACAGCGAC <b>AAG</b> ATTCCGTTTCATCCAGG | CCTGGATGAACGGAAT <b>CTT</b> GTGCGTGT  |
| p.Lys105Asn      | ACAGCGAC <b>AAT</b> ATTCCGTTTCATCCAGG | CCTGGATGAACGGAAT <b>ATT</b> GTGCGTGT  |
| gnomAD Variants  | Forward Primers                       | Reverse Primers                       |
| Wild-type        | ACGCCTTT <b>ATG</b> GTGTGGTCGCAGATCG  | CCACAC <b>CAT</b> AAAGGCGTTCATGGGCCG  |
| p.Met67Leu       | ACGCCTTT <b>CTG</b> GTGTGGTCGCAGATCG  | CCACAC <b>CAG</b> AAAGGCGTTCATGGGCCG  |
| Wild-type        | GCAGATC <b>GAG</b> CGGCGCAAGATCATGGA  | TGCGCCG <b>CTC</b> GATCTGCGACCACACCA  |
| p.Glu73Gly       | GCAGATC <b>GGG</b> CGGCGCAAGATCATGGA  | TGCGCCG <b>CCC</b> GATCTGCGACCACACCA  |
| Wild-type        | ATGGAG <b>CAG</b> TCGCCCGACATGCACAAC  | TCGGGCGA <b>CTG</b> CTCCATGATCTTGCGC  |
| p.Gln80His       | ATGGAG <b>CAC</b> TCGCCCGACATGCACAAC  | TCGGGCGA <b>GTG</b> CTCCATGATCTTGCGC  |
| Wild-type        | GGAGCAG <b>TCG</b> CCCGACATGCACAACGC  | TGTCGGG <b>CGA</b> CTGCTCCATGATCTTGC  |
| p.Ser81Leu       | GGAGCAG <b>TTG</b> CCCGACATGCACAACGC  | TGTCGGG <b>CAA</b> CTGCTCCATGATCTTGC  |
| Wild-type        | GCTGCTC <b>AAG</b> GACAGCGACAAGATTCC  | CGCTGTC <b>CTT</b> GAGCAGCTTCCAGCGTT  |
| p.Lys101Thr      | GCTGCTC <b>ACG</b> GACAGCGACAAGATTCC  | CGCTGTC <b>CGT</b> GAGCAGCTTCCAGCGTT  |
| Wild-type        | TCAAGGAC <b>AGC</b> GACAAGATTCCGTTCA  | CTTGTC <b>GCT</b> GTCCCTTGAGCAGCTTCCA |
| p.Ser103Gly      | TCAAGGAC <b>GGC</b> GACAAGATTCCGTTCA  | CTTGTC <b>GCC</b> GTCCCTTGAGCAGCTTCCA |
| Wild-type        | CAGCGAC <b>AAG</b> ATTCCGTTTCATCCAGGA | ACGGAAT <b>CTT</b> GTGCTGTCTTCCAGCA   |
| p.Lys105Arg      | CAGCGAC <b>AGG</b> ATTCCGTTTCATCCAGGA | ACGGAAT <b>CCT</b> GTGCTGTCTTCCAGCA   |
| Wild-type        | GCGACAAG <b>ATT</b> CCGTTTCATCCAGGAGG | GAACGG <b>AAT</b> CTTGTGCTGTCTTCCAG   |
| p.Ile106Val      | GCGACAAG <b>GTT</b> CCGTTTCATCCAGGAGG | GAACGG <b>AAC</b> CTTGTGCTGTCTTCCAG   |
| Wild-type        | ACAAGATT <b>CCG</b> TTCATCCAGGAGGCGG  | GATGAA <b>CGG</b> AATCTTGTGCTGTCTTCC  |
| p.Pro107Ser      | ACAAGATT <b>TCG</b> TTCATCCAGGAGGCGG  | GATGAA <b>CGA</b> AATCTTGTGCTGTCTTCC  |
| Wild-type        | TCCAGGAG <b>GCG</b> GAGCGGCTGCGCCTCA  | CCGCTC <b>CGC</b> CTCCTGGATGAACGGAAT  |
| p.Ala112Thr      | TCCAGGAG <b>ACG</b> GAGCGGCTGCGCCTCA  | CCGCTC <b>CGT</b> CTCCTGGATGAACGGAAT  |
| Wild-type        | TCAAGCAC <b>ATG</b> GCTGACTACCCTGACT  | TCAAG <b>CAT</b> GTGGCTGACTACCCTGACT  |
| p.Met120Val      | TCAAGCAC <b>GTG</b> GCTGACTACCCTGACT  | TCAAG <b>CAC</b> GTGGCTGACTACCCTGACT  |
| Wild-type        | CAAGTAC <b>CGG</b> CCGCGAAAGAAGGTGAA  | TTCGCGG <b>CCG</b> GTAAGTGTAGTCAGGGT  |
| p.Arg129Gln      | CAAGTAC <b>CAG</b> CCGCGAAAGAAGGTGAA  | TTCGCGG <b>CTG</b> GTAAGTGTAGTCAGGGT  |

**Table S4. Missense Variants in SRY and Other SOX Protein Residues Matching SOX4 HMG-domain Variants Identified in gnomAD.** Mutations of interest, i.e., resulting in the same variants as in SOX4 gnomAD individuals, are written in blue if they were identified in gnomAD and in red if they were identified in disease. Note that the last SOX4 variant matches wild-type SOX10 and is therefore also written in blue.

| <b>Protein</b> | <b>Variant</b>     | <b>Phenotype</b>      | <b>Reference</b> |
|----------------|--------------------|-----------------------|------------------|
| <b>SOX4</b>    | <b>p.Met67Leu</b>  | <b>Unknown</b>        | <b>gnomAD</b>    |
| SRY            | p.Ile68Thr         | Gonadal dysgenesis    | 4                |
| SOX9           | p.Met113Thr        | Campomelic dysplasia  | 5                |
| SOX9           | p.Met113Val        | Acampomelic Dysplasia | 6                |
| SOX10          | p.Met112Ile        | Waardenburg syndrome  | (Pingault, 2014) |
| <b>SOX4</b>    | <b>p.Glu73Gly</b>  | <b>Unknown</b>        | <b>gnomAD</b>    |
| SRY            | p.Gln74His         | XY sex reversal       | 4                |
| SOX9           | p.Ala119Val        | Campomelic dysplasia  | 7                |
| SOX11          | p.Glu63Gln         | Unknown               | gnomAD           |
| <b>SOX4</b>    | <b>p.Gln80His</b>  | <b>Unknown</b>        | <b>gnomAD</b>    |
| <b>SOX9</b>    | <b>p.Gln126His</b> | <b>Unknown</b>        | <b>gnomAD</b>    |
| <b>SOX4</b>    | <b>p.Ser81Leu</b>  | <b>Unknown</b>        | <b>gnomAD</b>    |
| SOX10          | p.Tyr126His        | Unknown               | gnomAD           |
| <b>SOX4</b>    | <b>p.Lys101Thr</b> | <b>Unknown</b>        | <b>gnomAD</b>    |
| <b>SOX9</b>    | <b>p.Asn147Thr</b> | <b>Unknown</b>        | <b>gnomAD</b>    |
| <b>SOX4</b>    | <b>p.Ser103Gly</b> | <b>Unknown</b>        | <b>gnomAD</b>    |
| <b>SOX4</b>    | <b>p.Lys105Arg</b> | <b>Unknown</b>        | <b>gnomAD</b>    |
| SRY            | p.Lys106Ile        | Gonadal dysgenesis    | 4                |
| <b>SOX4</b>    | <b>p.Ile106Val</b> | <b>Unknown</b>        | <b>gnomAD</b>    |
| SOX9           | p.Arg152Pro        | Campomelic dysplasia  | 7                |
| SOX11          | p.Ile96Thr         | Unknown               | gnomAD           |

|             |                    |                                              |               |
|-------------|--------------------|----------------------------------------------|---------------|
| <b>SOX4</b> | <b>p.Pro107Ser</b> | <b>Unknown</b>                               | <b>gnomAD</b> |
| SRY         | p.Pro108His        | 46, XY gonadal dysgenesis                    | 4             |
| <b>SOX4</b> | <b>p.Ala112Thr</b> | <b>Unknown</b>                               | <b>gnomAD</b> |
| <b>SRY</b>  | <b>p.Ala113Thr</b> | <b>Gonadal dysgenesis</b>                    | 4             |
| SOX9        | p.Ala158Val        | Campomelic dysplasia                         | 7             |
| <b>SOX9</b> | <b>p.Ala158Thr</b> | <b>Campomelic dysplasia, XY sex reversal</b> | 7             |
| SOX10       | p.Ala157Val        | Waardenburg syndrome type IV                 | 8             |
| SOX11       | p.Ala102Val        | Coffin-Siris syndrome                        | 9             |
| <b>SOX4</b> | <b>p.Met120Val</b> | <b>Unknown</b>                               | <b>gnomAD</b> |
| SOX10       | p.Lys165Arg        | Unknown                                      | gnomAD        |
| <b>SOX4</b> | <b>p.Arg129Gln</b> | <b>Unknown</b>                               | <b>gnomAD</b> |
| SOX10       | p.Gln174Pro        | Waardenburg syndrome                         | 10            |

## **Supplemental References**

1. Sobreira, N., Schiettecatte, F., Valle, D., and Hamosh, A. (2015). GeneMatcher: a matching tool for connecting investigators with an interest in the same gene. *Hum Mutat* 36, 928-930.
2. Wright, C.F., Fitzgerald, T.W., Jones, W.D., Clayton, S., McRae, J.F., van Kogelenberg, M., King, D.A., Ambridge, K., Barrett, D.M., Bayzetinova, T., et al. (2015). Genetic diagnosis of developmental disorders in the DDD study: a scalable analysis of genome-wide research data. *Lancet* 385, 1305-1314.
3. Jauch, R., Ng, C.K., Narasimhan, K., and Kolatkar, P.R. (2012). The crystal structure of the Sox4 HMG domain-DNA complex suggests a mechanism for positional interdependence in DNA recognition. *Biochem J* 443, 39-47.
4. Wang, X., Xue, M., Zhao, M., He, F., Li, C., and Li, X. (2018). Identification of a novel mutation (Ala66Thr) of SRY gene causes XY pure gonadal dysgenesis by affecting DNA binding activity and nuclear import. *Gene* 651, 143-151.
5. Wada, Y., Nishimura, G., Nagai, T., Sawai, H., Yoshikata, M., Miyagawa, S., Hanita, T., Sato, S., Hasegawa, T., Ishikawa, S., et al. (2009). Mutation analysis of SOX9 and single copy number variant analysis of the upstream region in eight patients with campomelic dysplasia and acampomelic campomelic dysplasia. *Am J Med Genet A* 149A, 2882-2885.
6. Staffler, A., Hammel, M., Wahlbuhl, M., Bidlingmaier, C., Flemmer, A.W., Pagel, P., Nicolai, T., Wegner, M., and Holzinger, A. (2010). Heterozygous SOX9 mutations allowing for residual DNA-binding and transcriptional activation lead to the acampomelic variant of campomelic dysplasia. *Hum Mutat* 31, E1436-1444.
7. Harley, V.R., Clarkson, M.J., and Argentaro, A. (2003). The molecular action and regulation of the testis-determining factors, SRY (sex-determining region on the Y chromosome) and SOX9 [SRY-related high-mobility group (HMG) box 9]. *Endocr Rev* 24, 466-487.
8. Morin, M., Vinuela, A., Rivera, T., Villamar, M., Moreno-Pelayo, M.A., Moreno, F., and del Castillo, I. (2008). A de novo missense mutation in the gene encoding the SOX10 transcription factor in a Spanish sporadic case of Waardenburg syndrome type IV. *Am J Med Genet A* 146A, 1032-1037.
9. Okamoto, N., Ehara, E., Tsurusaki, Y., Miyake, N., and Matsumoto, N. (2018). Coffin-Siris syndrome and cardiac anomaly with a novel SOX11 mutation. *Congenit Anom (Kyoto)* 58, 105-107.

10. Chaoui, A., Watanabe, Y., Touraine, R., Baral, V., Goossens, M., Pingault, V., and Bondurand, N. (2011). Identification and functional analysis of SOX10 missense mutations in different subtypes of Waardenburg syndrome. *Hum Mutat* 32, 1436-1449.
